# Supplementary material for: Non-isothermal crystallization kinetics of polypropylene/short glass fibre/multiwalled carbon nanotube composites
Source: Royal Society of Chemistry journal article supplement (doi:10.1039/c8ra07243d), 2018-01-01
Supplement: c8ra07243d1.pdf [file c8ra07243d1.pdf]

**Supplementary files:**

**Non-isothermal crystallization kinetics of polypropylene/short-glass fibre /multiwalled carbon nanotube composites**

Nanoth Rasana <sup>a</sup>, Karingamanna Jayanarayanan <sup>\*b</sup>, Alessandro Pegoretti<sup>c</sup>

<sup>a</sup>*Department of Chemical Engineering and Materials Science, Amrita School Of Engineering, Coimbatore, Amrita Vishwa Vidyapeetham, India*

<sup>b</sup>*Centre of Excellence in Advanced Materials and Green Technologies (CoE-AMGT), Amrita School of Engineering, Coimbatore, Amrita Vishwa Vidyapeetham, India.*

<sup>c</sup>*Department of Industrial Engineering, University of Trento, Via Sommarive 9, 38123 Trento, Italy.*

*Corresponding author : [kj\\_narayanan@cb.amrita.edu](mailto:kj_narayanan@cb.amrita.edu), [kjnarayanan@gmail.com](mailto:kjnarayanan@gmail.com)*

**Table S1** Stress -strain values of neat PP, PPC, PPG and PPGC composites

| Sample | Tensile Strength (MPa) | Young's Modulus (MPa) | Strain at break (%) |
|--------|------------------------|-----------------------|---------------------|
| PP     | 29.2±0.5               | 1100±31               | 20±1.5              |
| PPC1   | 31.7±0.7               | 1186±52               | 16.2±0.8            |
| PPC3   | 33.9±0.7               | 1523±59               | 9±0.4               |
| PPC5   | 36±0.6                 | 1587±47               | 7.5±0.3             |
| PPG    | 41.9±1.2               | 2542±78               | 2.8±0.2             |
| PPGC1  | 46.3±0.6               | 2210±55               | 3.4±0.1             |
| PPGC2  | 47.7±0.5               | 2456±92               | 3.7±0.2             |
| PPGC3  | 51.4±1.3               | 2500±68               | 4.9±0.4             |
| PPGC5  | 48.4±0.8               | 2200±71               | 5.5±0.3             |

**Table S2** Crystallization characteristics of neat PP, PPG and PPGC composites at different cooling rates.

| Specimens | R (°C/min) | T <sub>o</sub> (°C) | T <sub>c</sub> (°C) | T <sub>e</sub> (°C) | T <sub>m</sub> (°C) | t <sub>½</sub> (min) | Δw (°C) |
|-----------|------------|---------------------|---------------------|---------------------|---------------------|----------------------|---------|
| Neat PP   | 5          | 119.8               | 113.13              | 109.1               | 167.15              | 1.1                  | 5       |
|           | 10         | 117                 | 111.43              | 106.4               | 165.86              | 0.53                 | 5.2     |
|           | 15         | 116.5               | 109.61              | 103.5               | 165.19              | 0.44                 | 5.8     |
|           | 20         | 114.8               | 108.62              | 101                 | 165.61              | 0.35                 | 6.5     |
| PPG       | 5          | 129.9               | 125.8               | 121.4               | 164.98              | 0.86                 | 3.6     |
|           | 10         | 126.8               | 122.22              | 117.8               | 163.01              | 0.45                 | 4.4     |
|           | 15         | 125.2               | 119.49              | 113.8               | 166.81              | 0.38                 | 5.1     |
|           | 20         | 122.4               | 116.58              | 109.8               | 163.48              | 0.31                 | 5.9     |
| PPGC1     | 5          | 133                 | 127.02              | 123.2               | 165.3               | 0.98                 | 3.5     |
|           | 10         | 127.2               | 122.95              | 117.8               | 167.33              | 0.47                 | 4.1     |
|           | 15         | 127                 | 122.47              | 116.5               | 165.43              | 0.35                 | 5.5     |
|           | 20         | 125.5               | 119.82              | 112.6               | 165.43              | 0.32                 | 6.8     |
| PPGC2     | 5          | 134.8               | 129.55              | 126.25              | 164.84              | 0.85                 | 4       |
|           | 10         | 130.2               | 125.03              | 119.8               | 165.76              | 0.52                 | 5.4     |
|           | 15         | 127.5               | 121.72              | 115                 | 167.41              | 0.41                 | 6.4     |
|           | 20         | 127.2               | 121.12              | 113.2               | 165.27              | 0.34                 | 7.25    |
| PPGC3     | 5          | 133.8               | 128.6               | 125                 | 166.04              | 0.882                | 4.2     |
|           | 10         | 131.4               | 126.27              | 121.5               | 164.53              | 0.498                | 4.6     |
|           | 15         | 129                 | 122.61              | 115.2               | 165.33              | 0.463                | 6.3     |
|           | 20         | 126.6               | 119.7               | 109.8               | 165.34              | 0.422                | 8.3     |
| PPGC5     | 5          | 134.3               | 128.91              | 123.3               | 165.65              | 1.1016               | 4.4     |
|           | 10         | 130                 | 125.30              | 119                 | 167.36              | 0.55                 | 5.8     |
|           | 15         | 128.5               | 123.88              | 116.5               | 163.67              | 0.4016               | 5.9     |
|           | 20         | 127                 | 121.27              | 113                 | 165.90              | 0.3533               | 7.4     |

**Table S3** Avrami parameters for non-isothermal crystallization of neat PP, PPG and PPGC composites

| Samples | Avrami parameters | Cooling rate ( $^{\circ}\text{C}/\text{min}$ ) |        |       |       |
|---------|-------------------|------------------------------------------------|--------|-------|-------|
|         |                   | 5                                              | 10     | 15    | 20    |
| PP      | log Z             | -0.306                                         | -0.038 | 0.443 | 0.639 |
|         | log $Z_c$         | -0.061                                         | -0.004 | 0.029 | 0.032 |
|         | $Z_c$             | 0.94                                           | 0.99   | 1.03  | 1.03  |
|         | n                 | 1.75                                           | 1.63   | 1.55  | 1.54  |
|         | Average n         | 1.62                                           |        |       |       |
| PPG     | log Z             | -0.058                                         | 0.464  | 0.569 | 0.727 |
|         | log $Z_c$         | -0.012                                         | 0.046  | 0.038 | 0.036 |
|         | $Z_c$             | 0.98                                           | 1.05   | 1.04  | 1.04  |
|         | n                 | 2.56                                           | 2.32   | 1.89  | 1.65  |
|         | Average n         | 2.11                                           |        |       |       |
| PPGC1   | log Z             | -0.038                                         | 0.409  | 0.676 | 0.715 |
|         | log $Z_c$         | -0.008                                         | 0.041  | 0.045 | 0.036 |
|         | $Z_c$             | 0.99                                           | 1.04   | 1.05  | 1.04  |
|         | n                 | 2.82                                           | 2.52   | 2.12  | 1.81  |
|         | Average n         | 2.32                                           |        |       |       |
| PPGC2   | log Z             | -0.01                                          | 0.429  | 0.697 | 0.825 |
|         | log $Z_c$         | -0.002                                         | 0.043  | 0.047 | 0.041 |
|         | $Z_c$             | 1.00                                           | 1.04   | 1.05  | 1.04  |
|         | n                 | 3.8                                            | 2.89   | 2.72  | 2.1   |
|         | Average n         | 2.87                                           |        |       |       |
| PPGC3   | log Z             | -0.072                                         | 0.501  | 0.625 | 0.650 |
|         | log $Z_c$         | -0.014                                         | 0.050  | 0.042 | 0.032 |
|         | $Z_c$             | 0.99                                           | 1.05   | 1.04  | 1.03  |
|         | n                 | 3.73                                           | 3.31   | 2.8   | 2.5   |

|       |                    |        |       |       |       |
|-------|--------------------|--------|-------|-------|-------|
|       | Average n          | 3.1    |       |       |       |
| PPGC5 | log Z              | -0.166 | 0.354 | 0.622 | 0.685 |
|       | log Z <sub>c</sub> | -0.033 | 0.035 | 0.041 | 0.034 |
|       | Z <sub>c</sub>     | 0.967  | 1.04  | 1.04  | 1.03  |
|       | n                  | 3.2    | 2.68  | 2.47  | 2.32  |
|       | Average n          | 2.73   |       |       |       |

**Table S4** Parameters of Mo's model for non-isothermal crystallization of PP, PPG and PPGC composites

| Samples | Mo's parameters | Relative crystallinity (%) |       |       |       |       |
|---------|-----------------|----------------------------|-------|-------|-------|-------|
|         |                 | 10                         | 30    | 50    | 70    | 90    |
| PP      | $\alpha$        | 0.84                       | 0.95  | 1.01  | 1.08  | 1.19  |
|         | Log F(T)        | 0.46                       | 0.70  | 0.81  | 0.89  | 0.99  |
|         | F(T)            | 1.58                       | 2.01  | 2.25  | 2.44  | 2.69  |
|         | R <sup>2</sup>  | 0.986                      | 0.980 | 0.976 | 0.973 | 0.971 |
| PPG     | $\alpha$        | 1.01                       | 1.19  | 1.28  | 1.35  | 1.44  |
|         | log F(T)        | 0.35                       | 0.54  | 0.65  | 0.74  | 0.87  |
|         | F(T)            | 1.42                       | 1.72  | 1.92  | 2.09  | 2.39  |
|         | R <sup>2</sup>  | 0.978                      | 0.981 | 0.979 | 0.977 | 0.973 |
| PPGC1   | $\alpha$        | 0.95                       | 1.12  | 1.22  | 1.32  | 1.42  |
|         | log F(T)        | 0.38                       | 0.56  | 0.66  | 0.75  | 0.87  |
|         | F(T)            | 1.46                       | 1.75  | 1.93  | 2.12  | 2.38  |
|         | R <sup>2</sup>  | 0.991                      | 0.987 | 0.984 | 0.982 | 0.979 |
| PPGC2   | $\alpha$        | 0.89                       | 1.02  | 1.33  | 1.48  | 1.71  |
|         | log F(T)        | 0.46                       | 0.61  | 0.67  | 0.76  | 0.89  |
|         | F(T)            | 1.58                       | 1.84  | 1.95  | 2.14  | 2.44  |
|         | R <sup>2</sup>  | 0.964                      | 0.983 | 0.991 | 0.993 | 0.996 |
| PPGC3   | $\alpha$        | 0.98                       | 1.18  | 1.29  | 1.41  | 1.50  |
|         | Log F(T)        | 0.37                       | 0.56  | 0.66  | 0.77  | 0.92  |
|         | F(T)            | 1.44                       | 1.75  | 1.93  | 2.16  | 2.51  |
|         | R <sup>2</sup>  | 0.98                       | 0.985 | 0.979 | 0.978 | 0.982 |
| PPGC5   | $\alpha$        | 0.93                       | 1.04  | 1.12  | 1.20  | 1.25  |
|         | Log F(T)        | 0.41                       | 0.62  | 0.72  | 0.82  | 0.96  |
|         | F(T)            | 1.51                       | 1.86  | 2.05  | 2.27  | 2.61  |
|         | R <sup>2</sup>  | 0.963                      | 0.976 | 0.979 | 0.981 | 0.984 |

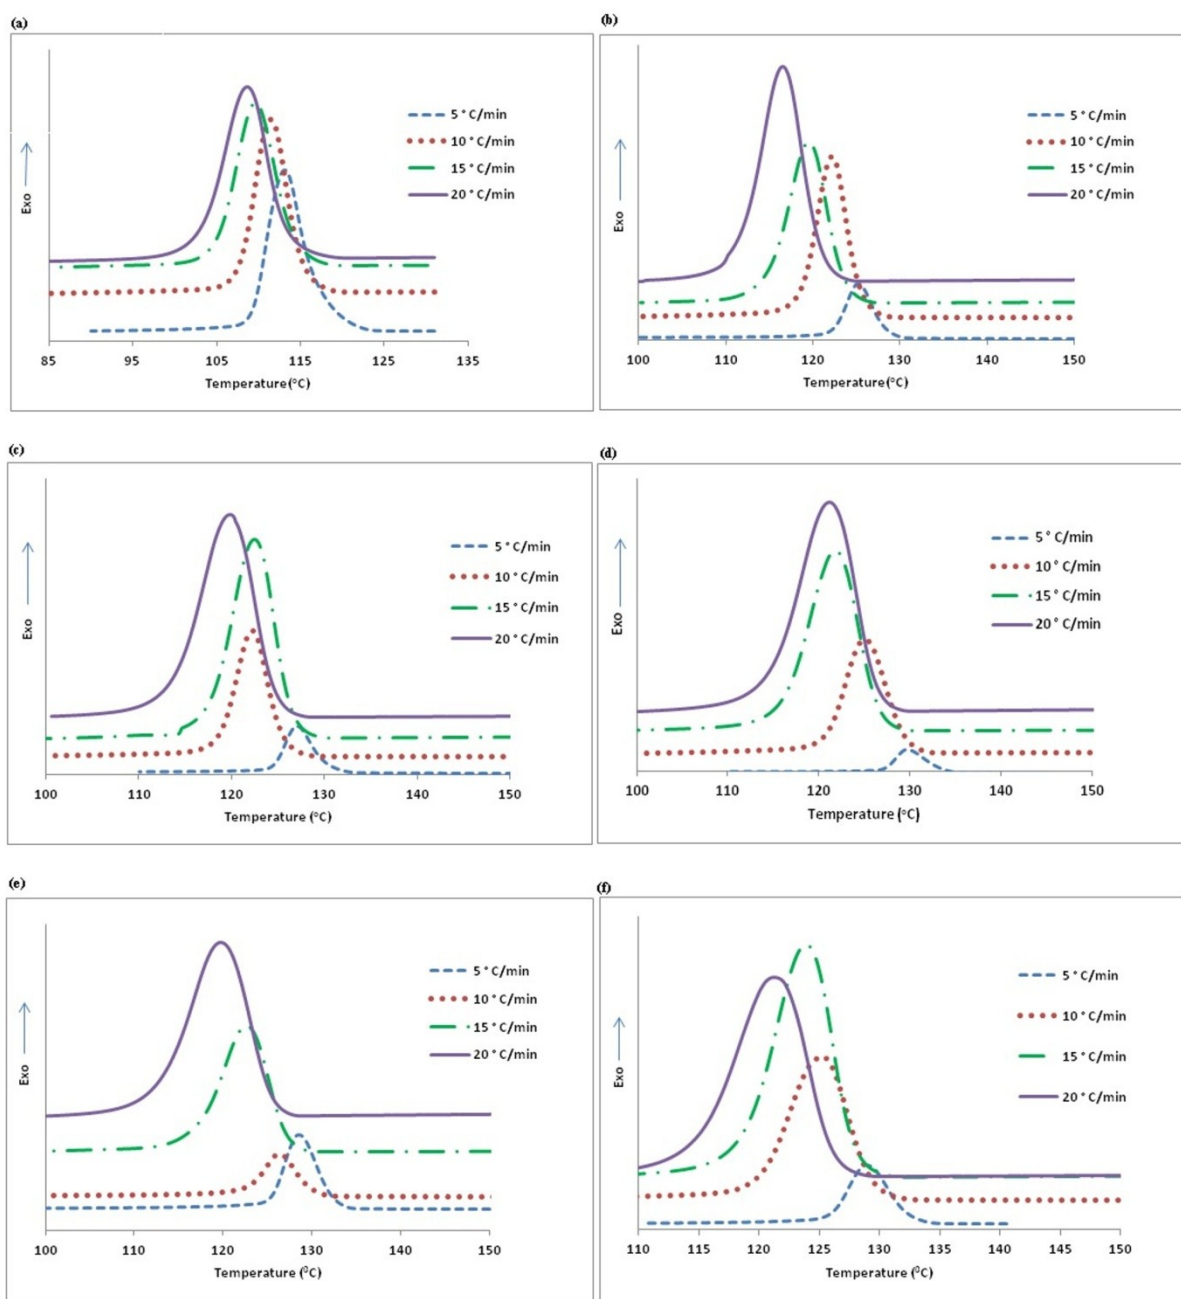

**Fig. S1** Non isothermal crystallization exotherms of a) PP, b) PPG, c) PPGC1, d) PPGC2, e) PPGC3, f) PPGC5 at different cooling rates.

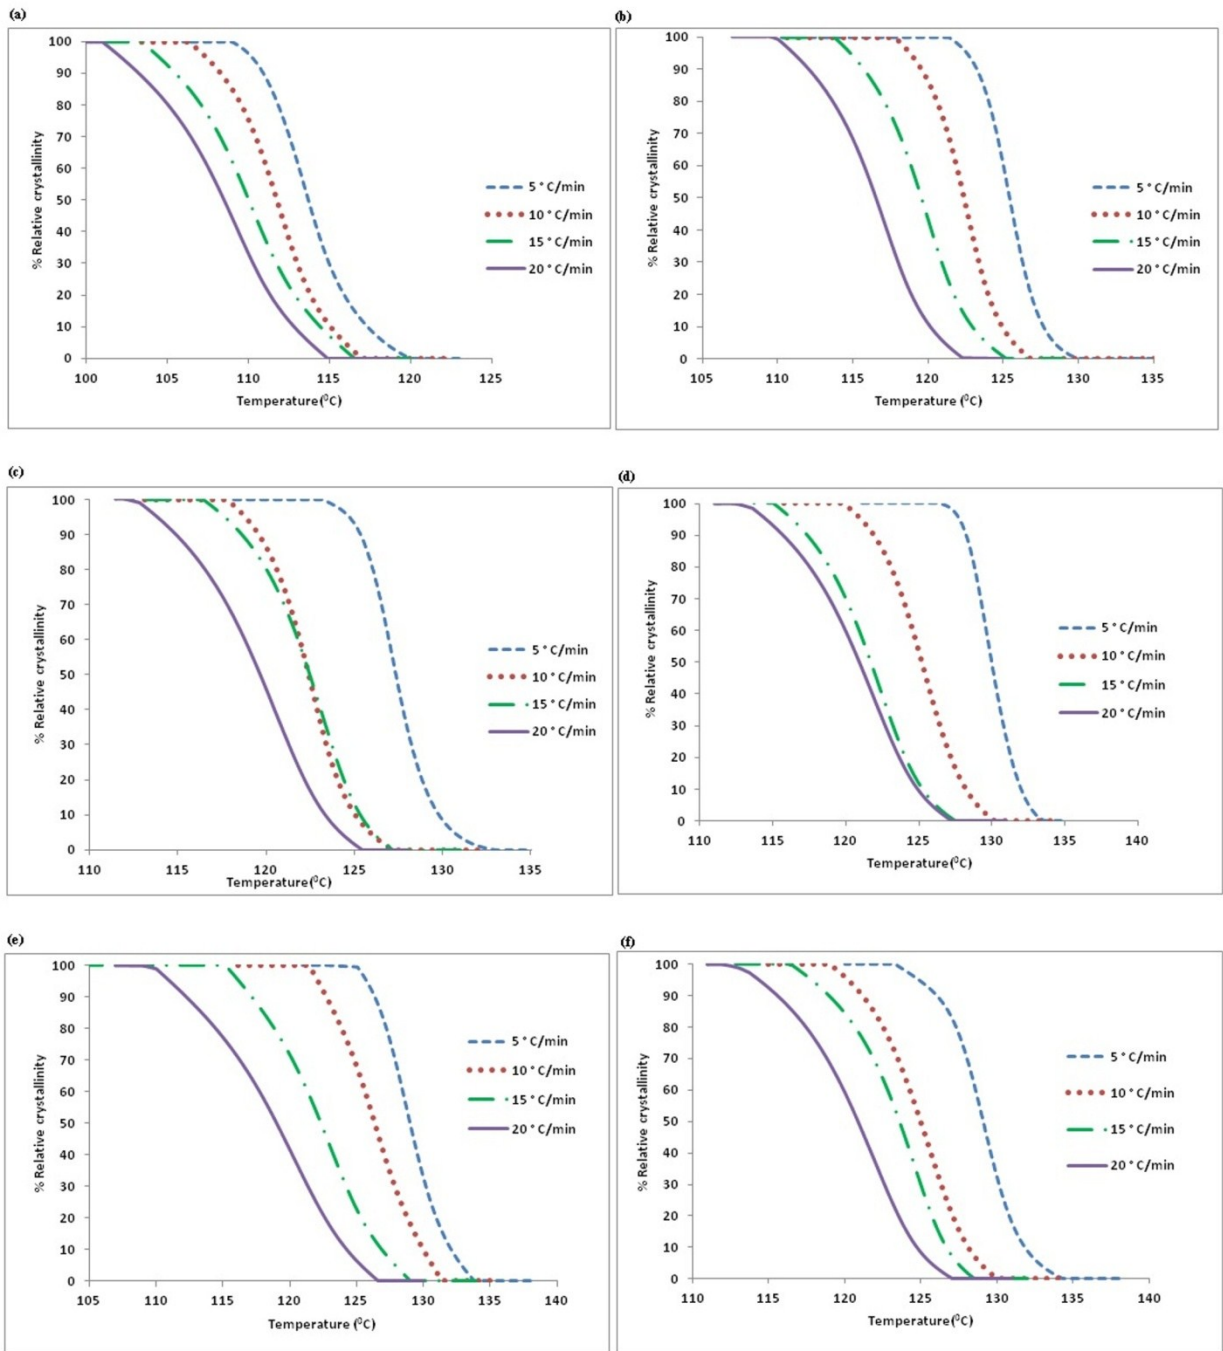

**Fig. S2** The percent relative crystallinity ( $X(T)$ ) of PP and composites as a function of temperature at varying cooling scans a) PP, b) PPG, c) PPGC1, d) PPGC2, e) PPGC3, f) PPGC5



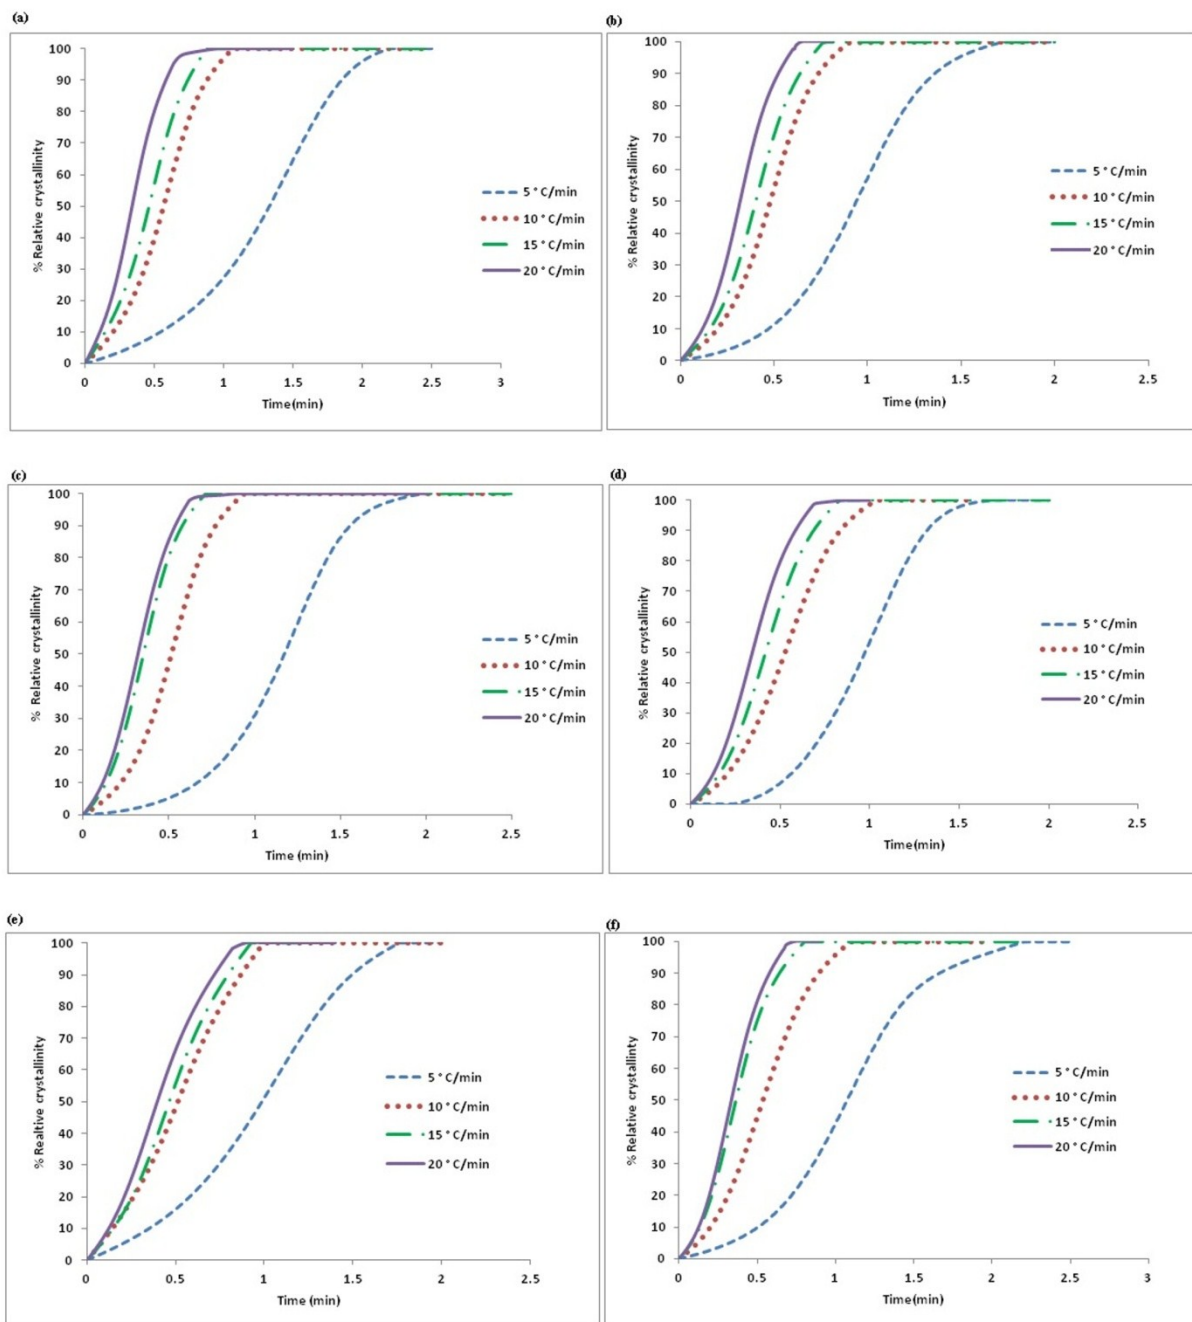

**Fig. S3** The percent relative crystallinity  $X(t)$  as a function of time at varying cooling scans  
 a) PP, b) PPG, c) PPGC1, d) PPGC2, e) PPGC3, f) PPGC5

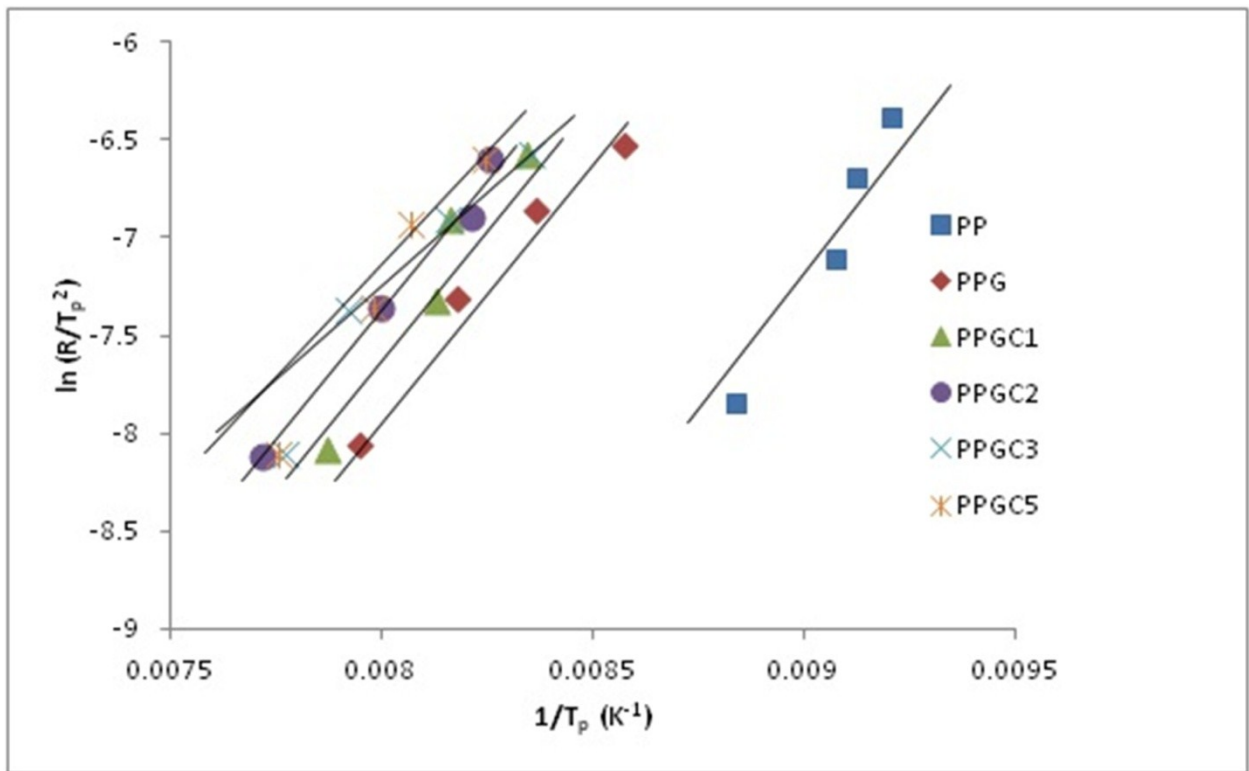

**Fig. S4** Kissinger's plot of  $\ln(R/T_p^2)$  vs.  $(1/T_p)$  for PP, PPG and PPGC composites.

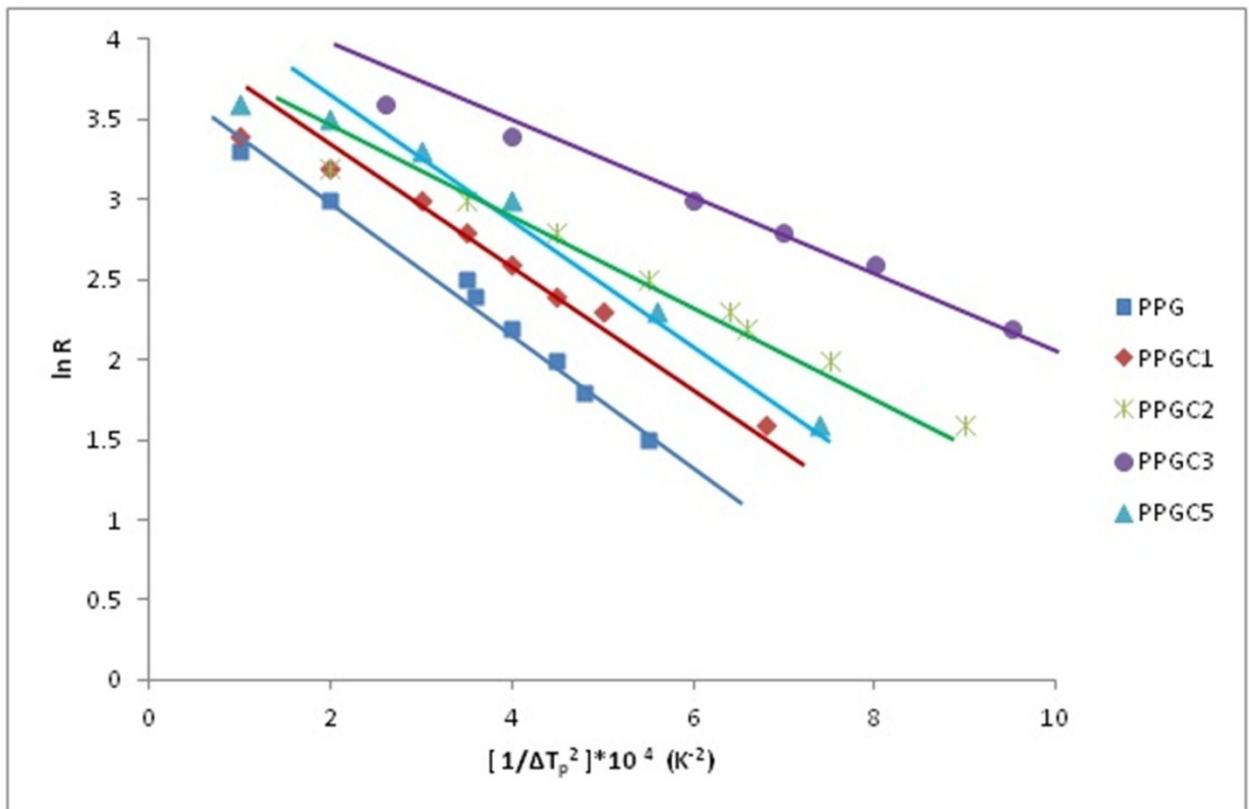

**Fig. S5** Plots of ln R vs.  $1/\Delta T_p^2$  for PP, PPG and PPGC composites
